# Supplementary material for: Epitaxial nucleation of CVD bilayer graphene on copper
Source: Royal Society of Chemistry journal article supplement (doi:10.1039/c6nr04557j), 2016-01-01
Supplement: c6nr04557j1.pdf [file c6nr04557j1.pdf]

## Electronic Supplementary Information

### Epitaxial nucleation of CVD bilayer graphene on copper

*Yenan Song, Jianing Zhuang, Meng Song, Shaoqian Yin, Yu Cheng, Xuwei Zhang, Miao Wang, Rong Xiang, Yang Xia, Shigeo Maruyama, Pei Zhao, Feng Ding, Hongtao Wang*

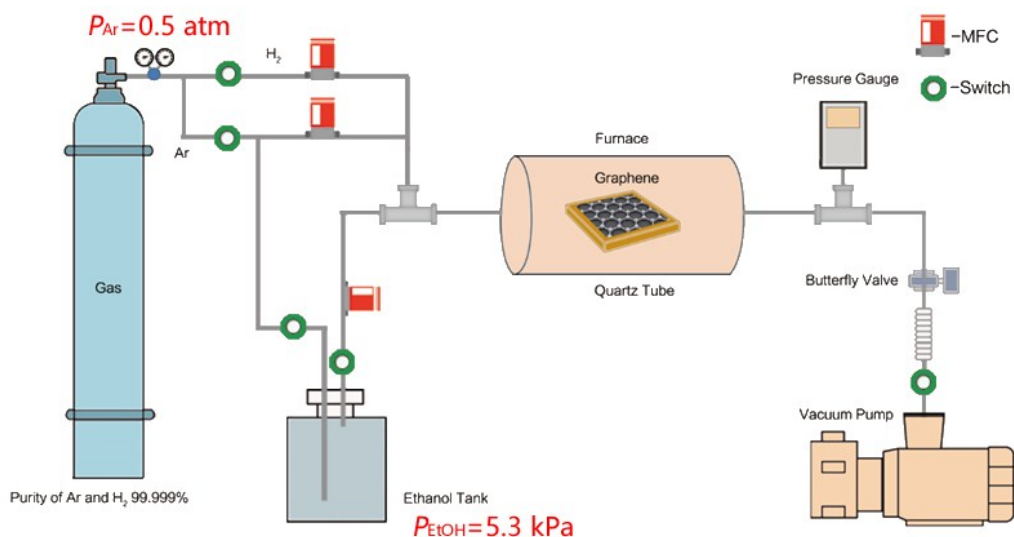

**Figure S1.** An ethanol-based epitaxial CVD system for BLG growth. The pressure of Ar flow was controlled by the release valve to be 0.5 atm, and the ethanol temperature was maintained at 19 °C, whose saturated vapor pressure is 5.3 kPa. Therefore, the flow rate ratio between Ar and ethanol in a bubbled ethanol flow is approximately 10:1.

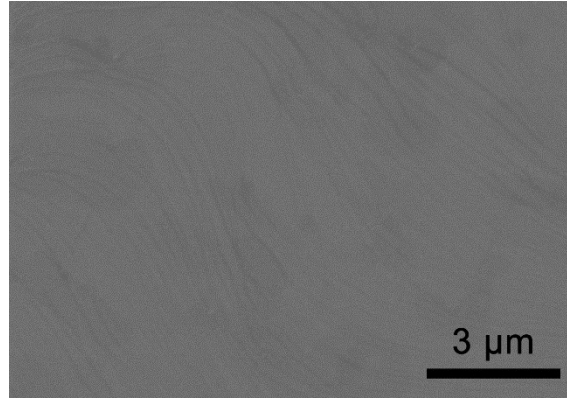

**Figure S2.** CVD growth after 5 hours still obtains a uniform BLG film, which indicates an equilibrium state for BLG growth using ethanol as the precursor.

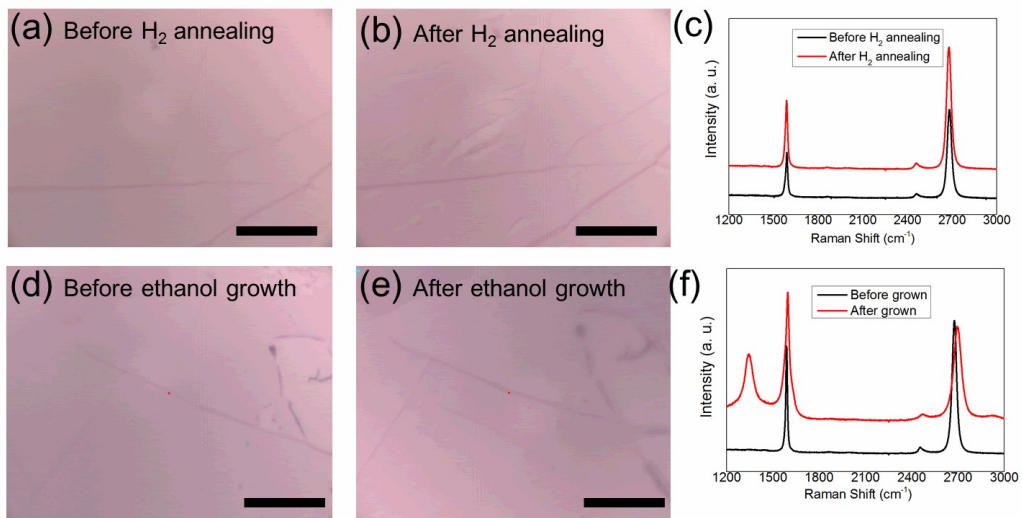

**Figure S3.** CVD growth at an equivalent condition using ethanol as the precursor but graphene transferred onto a Si/SiO<sub>2</sub> as the substrate instead of copper. No new graphene layer was obtained even consider the etching effect from H<sub>2</sub>.

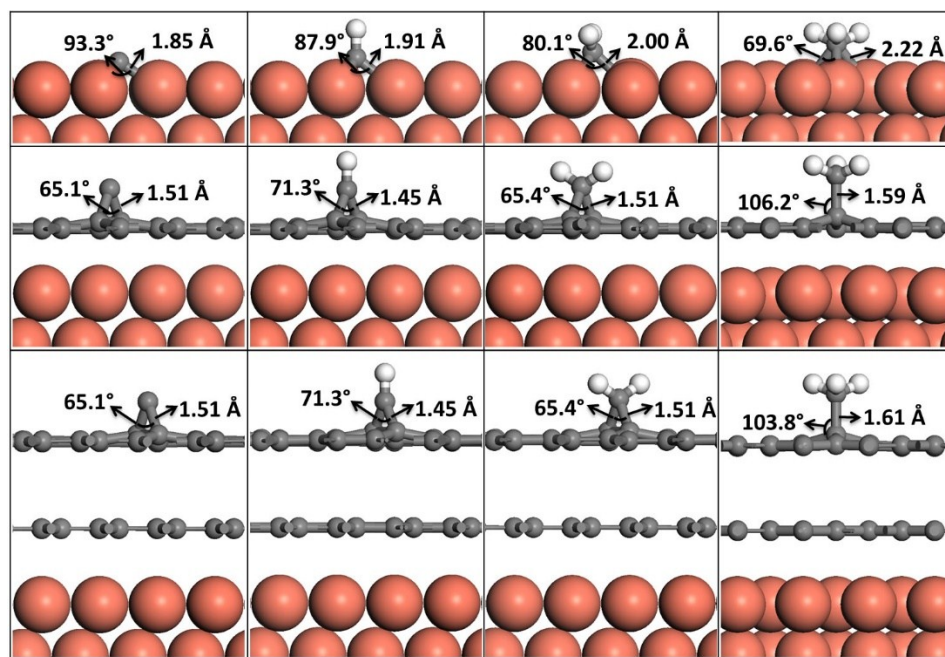

**Figure S4.** Geometries of different  $\text{CH}_i$  ( $i=0, 1, 2, 3$ ) radicals on a Cu(111)/graphene substrate.

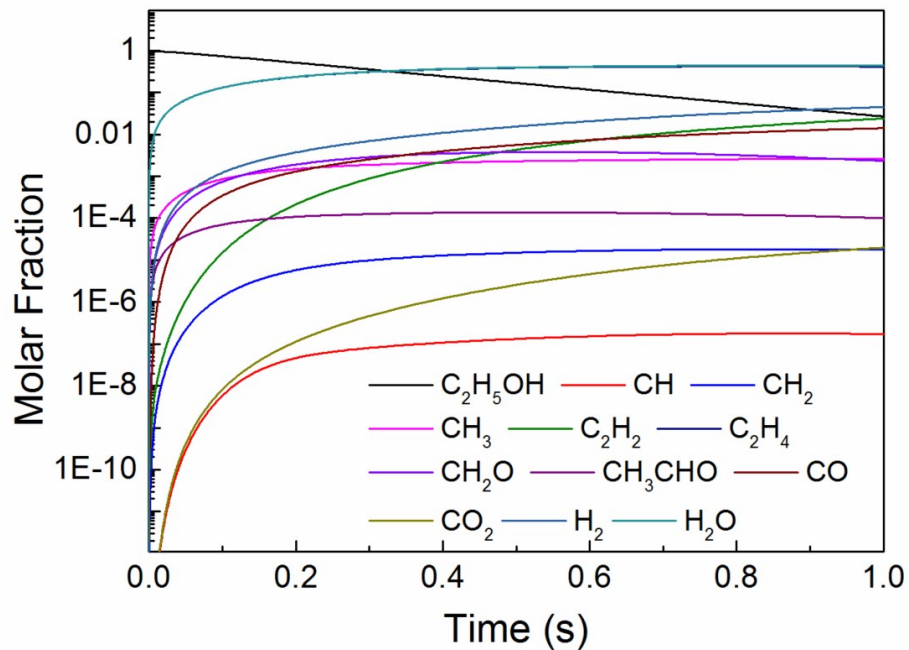

**Figure S5.** Decomposition products of from  $\text{C}_2\text{H}_5\text{OH}$  at high temperature calculated by CHEMKIN-II.

**Table S1.** Total energy data calculated for the radical/graphene/Cu(111) system.

| Radical           | C             | CH            | CH <sub>2</sub> | CH <sub>3</sub> |
|-------------------|---------------|---------------|-----------------|-----------------|
| Total energy (eV) | -1.23966895   | -6.05787351   | -12.11872387    | -18.21134477    |
| Substrate         | Cu(111)       | Cu(111)/MLG   | Cu(111)/BLG     |                 |
| Total energy (eV) | -140.81099300 | -308.66524756 | -475.86328245   |                 |
|                   | C             | CH            | CH <sub>2</sub> | CH <sub>3</sub> |
| Cu(111)           | -147.39233313 | -152.24136847 | -156.34241493   | -160.82963338   |
| Cu(111)/MLG       | -311.70228781 | -316.63018221 | -322.55594031   | -328.01285288   |
| Cu(111)/BLG       | -479.17043701 | -484.47056304 | -490.43820732   | -494.42125405   |

**Table S2.** Binding energy data for the CH<sub>i</sub> radical on a graphene/Cu(111) substrate.

|        | C      | CH     | CH <sub>2</sub> | CH <sub>3</sub> |
|--------|--------|--------|-----------------|-----------------|
| Cu     | 5.3417 | 5.3725 | 3.4127          | 1.8073          |
| 1LG/Cu | 1.7303 | 1.8400 | 1.7049          | 1.0692          |
| 2LG/Cu | 2.0637 | 2.5456 | 2.4524          | 0.3429          |
